# Supplementary material
Source: Springer Nature journal article supplement (https://www.springermedizin.de/resource/supplementary/40169_2012_18_MOESM1_ESM.pdf/9675396)

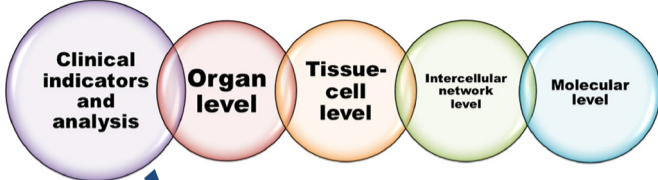

**Discovery Science**

**Early Translation Steps**

**Personalized Healthcare**

**Outcomes**

**Health Affairs**

**Clinical Trials**

**Performance Measures**

**Clinical Practice Guidelines**

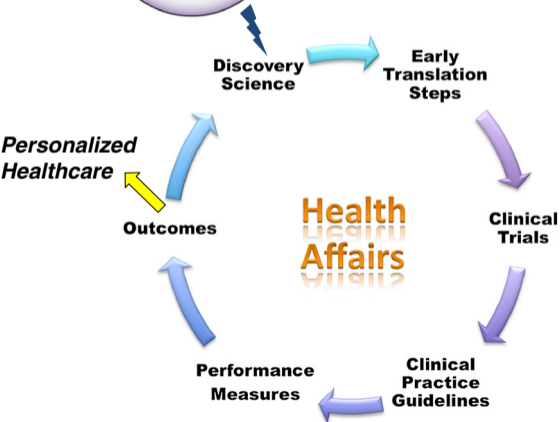

Supplement: MOESM1 [file 9675396]
